# Supplementary material for: Comparative Metabolite Fingerprinting of Four Different Cinnamon Species Analyzed via UPLC–MS and GC–MS and Chemometric Tools
Source: MDPI journal article supplement (doi:10.3390/molecules27092935), 2022-05-04
Supplement: s1 [file s1]

## Supplementary Materials

**Table S1.** Origin of the different species of cinnamon barks used in the analysis.

| <b>Name</b>              | <b>Location</b>         | <b>Sample codes</b> |
|--------------------------|-------------------------|---------------------|
| <i>Cinnamomum cassia</i> | Malaysia (Kuala Lumpur) | <b>CC</b>           |
| <i>Cinnamomum iners</i>  | Malaysia (Kuala Lumpur) | <b>CI</b>           |
| <i>Cinnamomum tamala</i> | Pakistan (Karachi)      | <b>CT</b>           |
| <i>Cinnamomum verum</i>  | Pakistan (Karachi)      | <b>CV</b>           |
| <i>Cinnamomum verum</i>  | Malaysia (Kuala Lumpur) | <b>CVM</b>          |

**Table S2.** Relative quantification of the most discriminatory metabolites in the studied *Cinnamomum* species identified by UPLC-ESI-MS and multivariate analysis. Values are represented as average ( $n=3$ ) of normalized peak areas  $\times 10^3$  to umbelliferon (internal standard)  $\pm$  standard error. Different letters indicate significant differences between cinnamon accessions according to least significant difference analysis ( $p < 0.05$ ; Tukey's test).

| No. | Rt(min) | Identification                           | CC <sup>(a)</sup>                    | CI <sup>(b)</sup>                        | CT <sup>(c)</sup>                      | CV <sup>(d)</sup>                      | CVM <sup>(e)</sup>                     |
|-----|---------|------------------------------------------|--------------------------------------|------------------------------------------|----------------------------------------|----------------------------------------|----------------------------------------|
| 1   | 1.82    | Protocatechuic acid                      | 46.46 $\pm$ 0.79 <sup>b,c,e</sup>    | 302.42 $\pm$ 5.67 <sup>a,c,d,e</sup>     | 1110.37 $\pm$ 26.36 <sup>a,b,d,e</sup> | 3.49 $\pm$ 3.84 <sup>b, c, e</sup>     | 180.3 $\pm$ 3.6 <sup>a,b,c,d</sup>     |
| 2   | 3.55    | Norboldine                               | 40.27 $\pm$ 1.79 <sup>b</sup>        | 10078.11 $\pm$ 130.36 <sup>a,c,d,e</sup> | 6.51 $\pm$ 0.01 <sup>b</sup>           | 5.71 $\pm$ 1.19 <sup>b</sup>           | 44.42 $\pm$ 1.88 <sup>b</sup>          |
| 3   | 3.64    | Dihydrocinnacasside- <i>O</i> -pentoside | 00 $\pm$ 00 <sup>b,c,d,e</sup>       | 29.54 $\pm$ 0.42 <sup>a,c,d,e</sup>      | 366.53 $\pm$ 5.15 <sup>a,b,d,e</sup>   | 13.71 $\pm$ 0.55 <sup>a,b,c,e</sup>    | 26.37 $\pm$ 1.18 <sup>a,b,c,d</sup>    |
| 4   | 3.67    | Dihydro coumaroyl - <i>O</i> - hexoside  | 276.51 $\pm$ 10 <sup>b,c,d,e</sup>   | 00 $\pm$ 00 <sup>a,c,d</sup>             | 307.53 $\pm$ 11.72 <sup>a,b,d,e</sup>  | 35.23 $\pm$ 2.01 <sup>a,b,c,e</sup>    | 10.94 $\pm$ 10.01 <sup>a,c,d</sup>     |
| 5   | 5.32    | Coumarin                                 | 1258.21 $\pm$ 10.34 <sup>d</sup>     | 336.2 $\pm$ 13.21 <sup>d,e</sup>         | 2114.18 $\pm$ 30.25 <sup>d</sup>       | 947.48 $\pm$ 20.85 <sup>a,b,c</sup>    | 947.9 $\pm$ 10 <sup>b</sup>            |
| 6   | 6.13    | Cinnamic acid                            | 30.62 $\pm$ 2.01 <sup>b,c,d,e</sup>  | 124.98 $\pm$ 23.18 <sup>a,d,e</sup>      | 129.85 $\pm$ 15.85 <sup>a,d,e</sup>    | 1120.86 $\pm$ 30.78 <sup>a,b,c,e</sup> | 1917.9 $\pm$ 7.29 <sup>a,b,c,d</sup>   |
| 7   | 6.5     | ( <i>E</i> )- Cinnamaldehyde             | 4.92 $\pm$ 1.29 <sup>b,d,e</sup>     | 1413.8 $\pm$ 38.29 <sup>a,c,d,e</sup>    | 52.3 $\pm$ 6.19 <sup>b,d,e</sup>       | 3424.28 $\pm$ 6.84 <sup>a,b,c,e</sup>  | 3831.26 $\pm$ 8.49 <sup>a,b,c,d</sup>  |
| 8   | 7.15    | Methylcinnamic acid                      | 00 $\pm$ 00 <sup>d,e</sup>           | 226.9 $\pm$ 5.36 <sup>d,e</sup>          | 00 $\pm$ 00 <sup>d,e</sup>             | 13745.3 $\pm$ 18.59 <sup>a,b,c,e</sup> | 6390.19 $\pm$ 15.96 <sup>a,b,c,d</sup> |
| 9   | 9.00    | Methylenedioxy-dimethylepicatechin       | 5.97 $\pm$ 3.81 <sup>b,c,d,e</sup>   | 78.49 $\pm$ 2.19 <sup>a,c,e</sup>        | 00 $\pm$ 00 <sup>a,b,d,e</sup>         | 78.64 $\pm$ 15.28 <sup>a,c,e</sup>     | 113.59 $\pm$ 5.61 <sup>a,b,c,d</sup>   |
| 10  | 14.54   | Linoleic acid                            | 221.18 $\pm$ 7.09 <sup>b,c,d,e</sup> | 2737.3 $\pm$ 51.69 <sup>a,c,d,e</sup>    | 473.19 $\pm$ 15.49 <sup>a,b,d,e</sup>  | 2065.69 $\pm$ 6.28 <sup>a,b,c,e</sup>  | 4371.19 $\pm$ 4.59 <sup>a,b,c,d</sup>  |
| 11  | 15.25   | Palmitic acid                            | 156.09 $\pm$ 5.49 <sup>b,c,d,e</sup> | 4340.74 $\pm$ 8.69 <sup>a,c,d,e</sup>    | 616.21 $\pm$ 10.89 <sup>a,b,d,e</sup>  | 4478.69 $\pm$ 3.19 <sup>a,b,c,e</sup>  | 1224.68 $\pm$ 20.49 <sup>a,b,c,d</sup> |
| 12  | 15.54   | Oleic acid                               | 122.67 $\pm$ 0.04 <sup>b,c,d,e</sup> | 1889.67 $\pm$ 8.36 <sup>a,c,d</sup>      | 655.4 $\pm$ 10.59 <sup>a,b,d,e</sup>   | 6391.06 $\pm$ 8.036 <sup>a,b,c,e</sup> | 1993.61 $\pm$ 3.19 <sup>a,c,d</sup>    |

\* CC: *Cinnamomum cassia* from Malaysia, CI: *C. iners* from Malaysia, CT: *C. tamala* from Pakistan, CV: *C. verum* from Pakistan, CVM: *C. verum* from Malaysia.

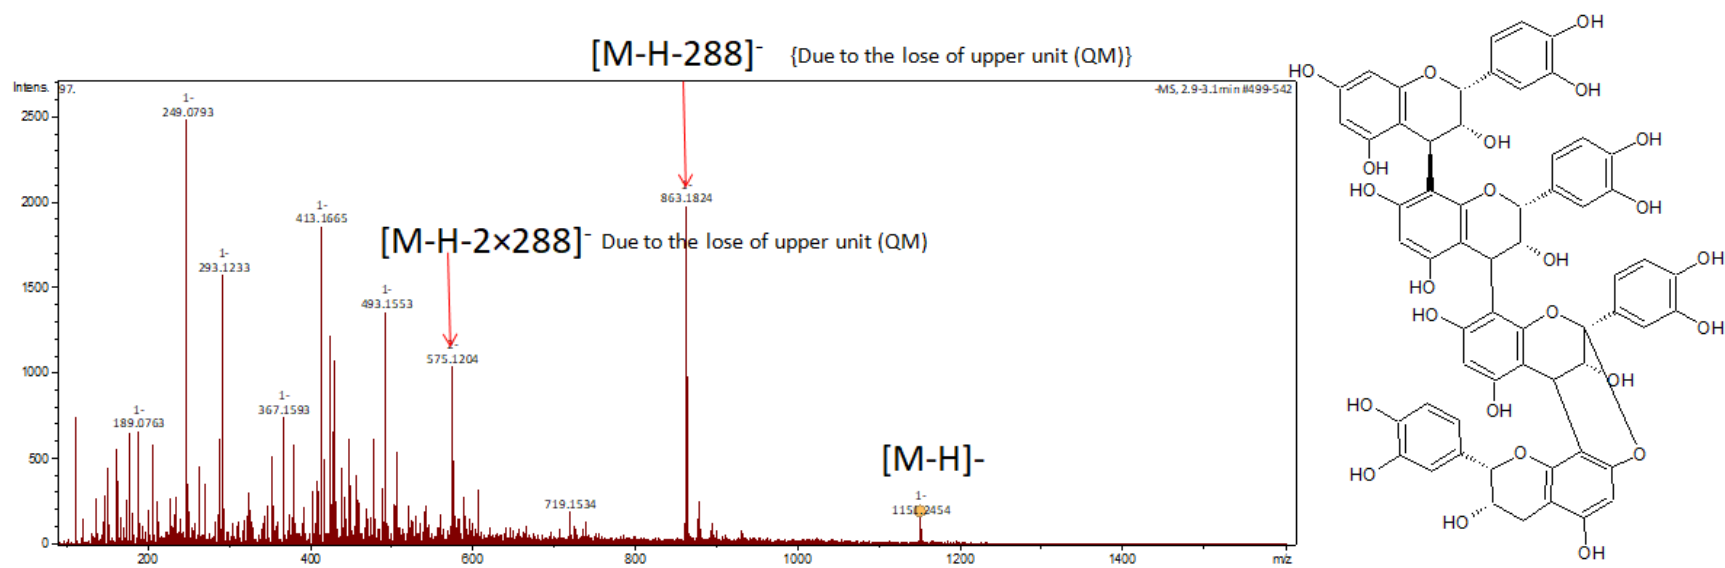

**Figure S1.** MS<sup>2</sup> Spectra of (epi) catechin tetramer (peak 9) [M-H]<sup>-</sup>  $m/z$  1151.2454, C<sub>60</sub>H<sub>48</sub>O<sub>24</sub>

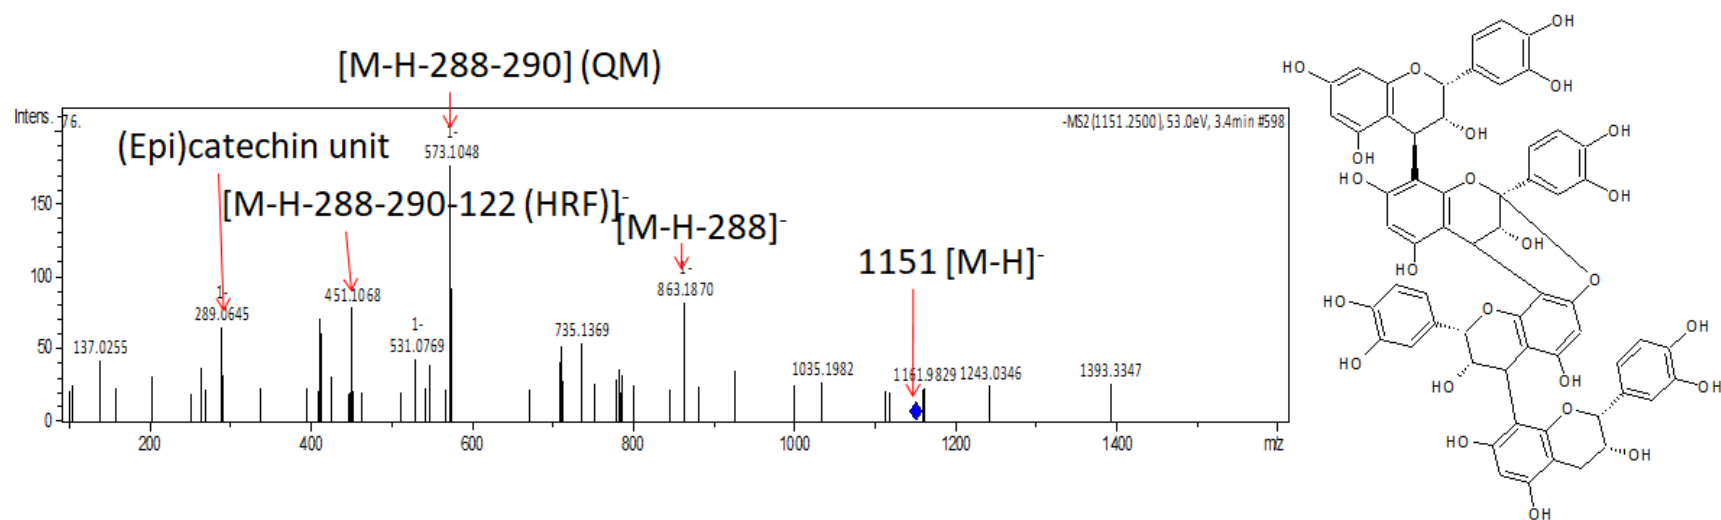

**Figure S2.** MS<sup>2</sup> Spectra of (epi) catechin tetramer (peak **10**) [M-H]<sup>-</sup>  $m/z$  1151.25, C<sub>60</sub>H<sub>48</sub>O<sub>24</sub>

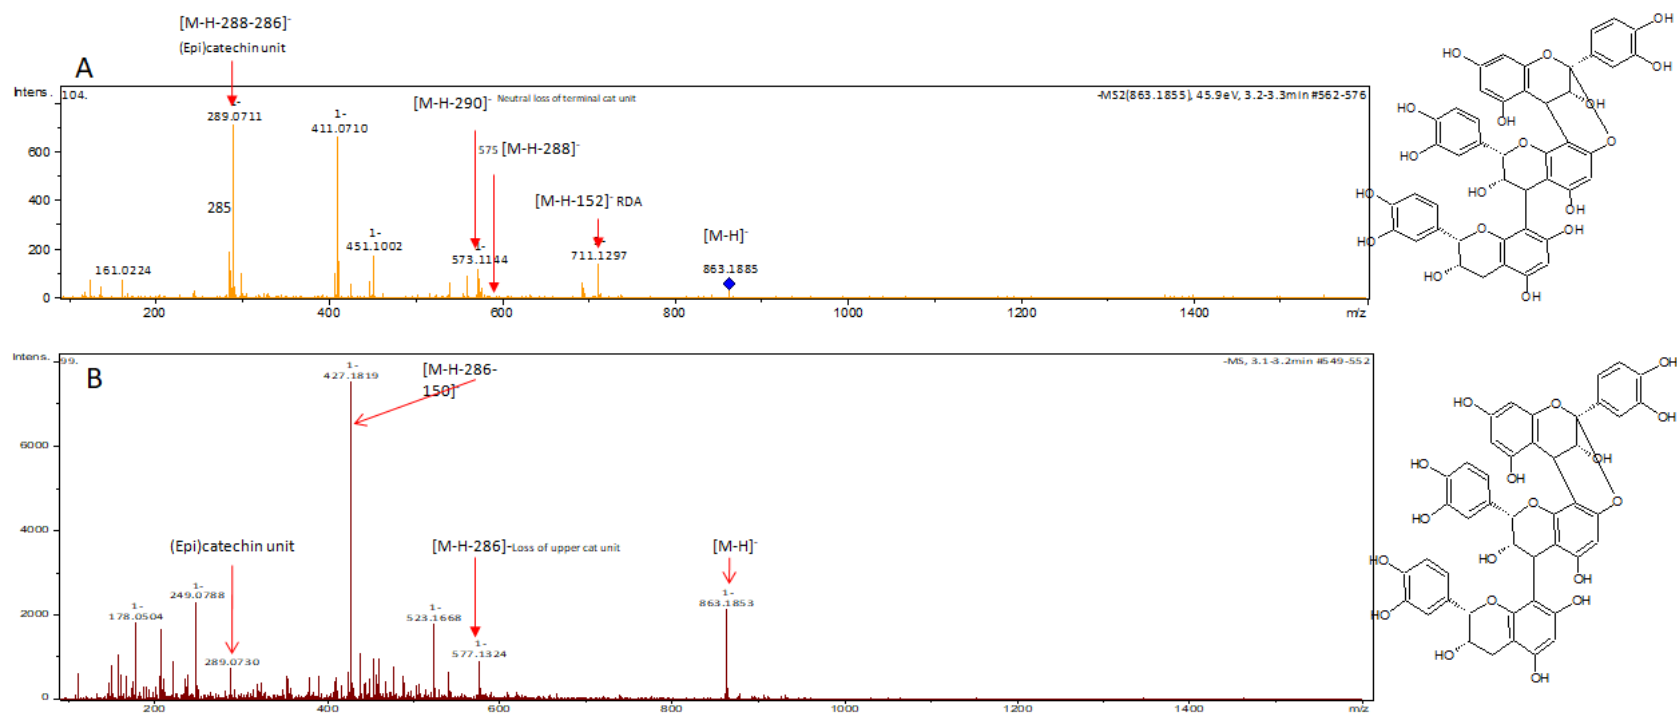

**Figure S3.** MS<sup>2</sup> Spectra of **A**, **B** (epi) catechin trimer A type (peaks **11**, **12**) [M-H]<sup>-</sup>  $m/z$  863.1885, C<sub>45</sub>H<sub>36</sub>O<sub>18</sub>

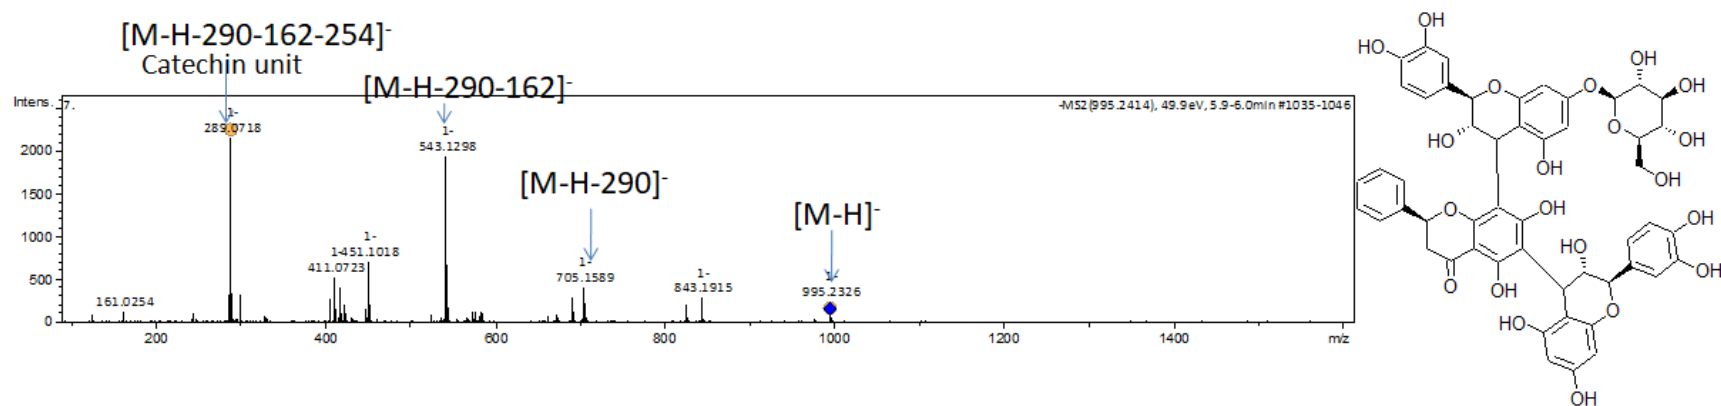

**Figure S4.** MS<sup>2</sup> Spectra of Catechin-chrysin-catechin-*O*-hexoside (peak **37**) [M-H]<sup>-</sup> *m/z* 995.2414, C<sub>51</sub>H<sub>48</sub>O<sub>21</sub>

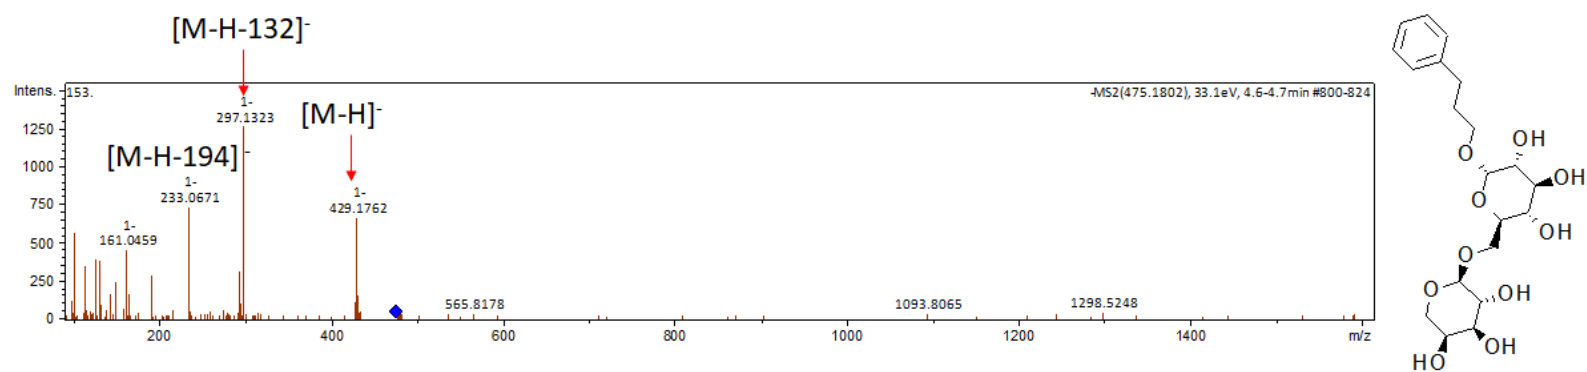

**Figure S5.** MS<sup>2</sup> Spectra of dihydrocinnamyl-*O*-pentosylhexoside (peak **27**) [M-H]<sup>-</sup> *m/z* 429.1762, C<sub>20</sub>H<sub>32</sub>O<sub>12</sub>

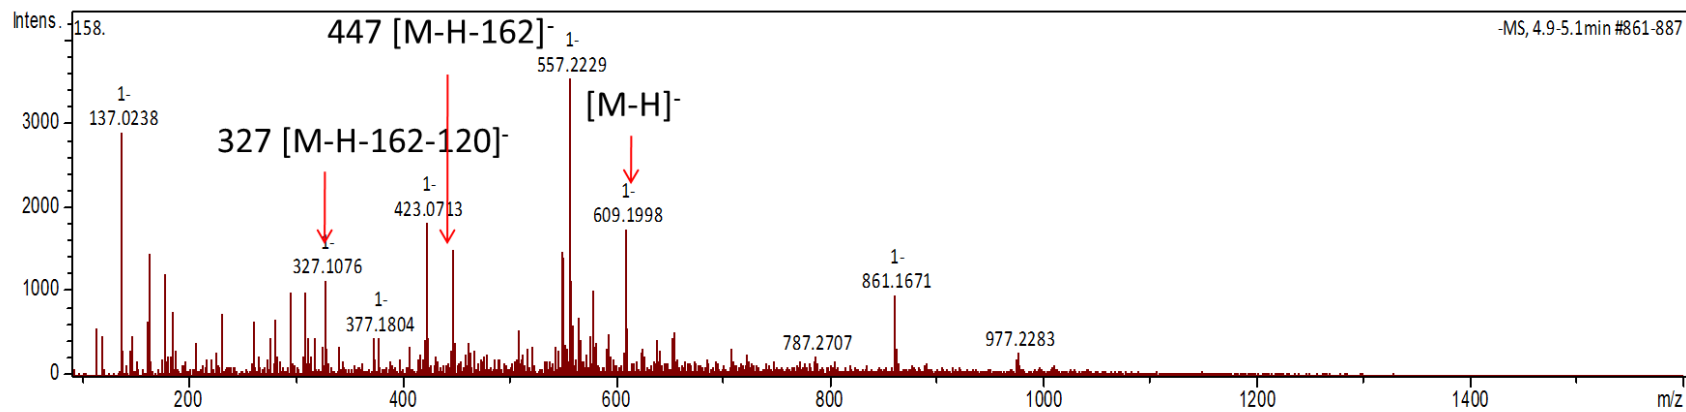

**Figure S6.** MS<sup>2</sup> Spectra of luteolin-*O/C*-di-hexoside (peak 30) [M-H]<sup>-</sup>  $m/z$  609.1998, C<sub>27</sub>H<sub>30</sub>O<sub>16</sub>



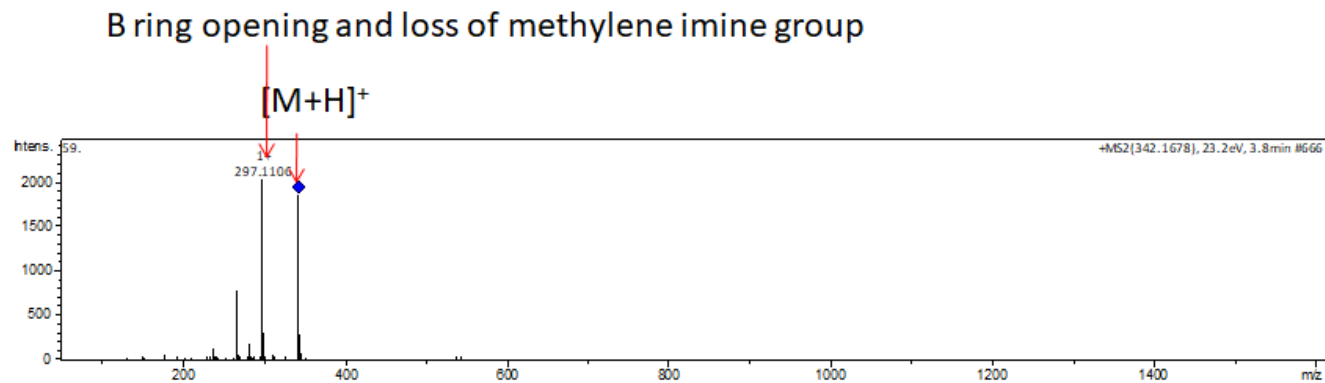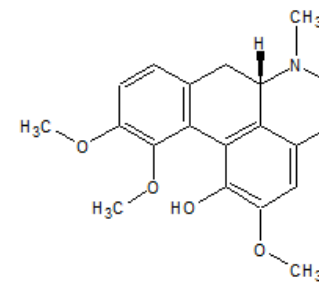

**Figure S7.** MS<sup>2</sup> Spectra of corydine (peak **21**)  $[M+H]^+$   $m/z$  342.1678, C<sub>20</sub>H<sub>23</sub>NO<sub>4</sub>

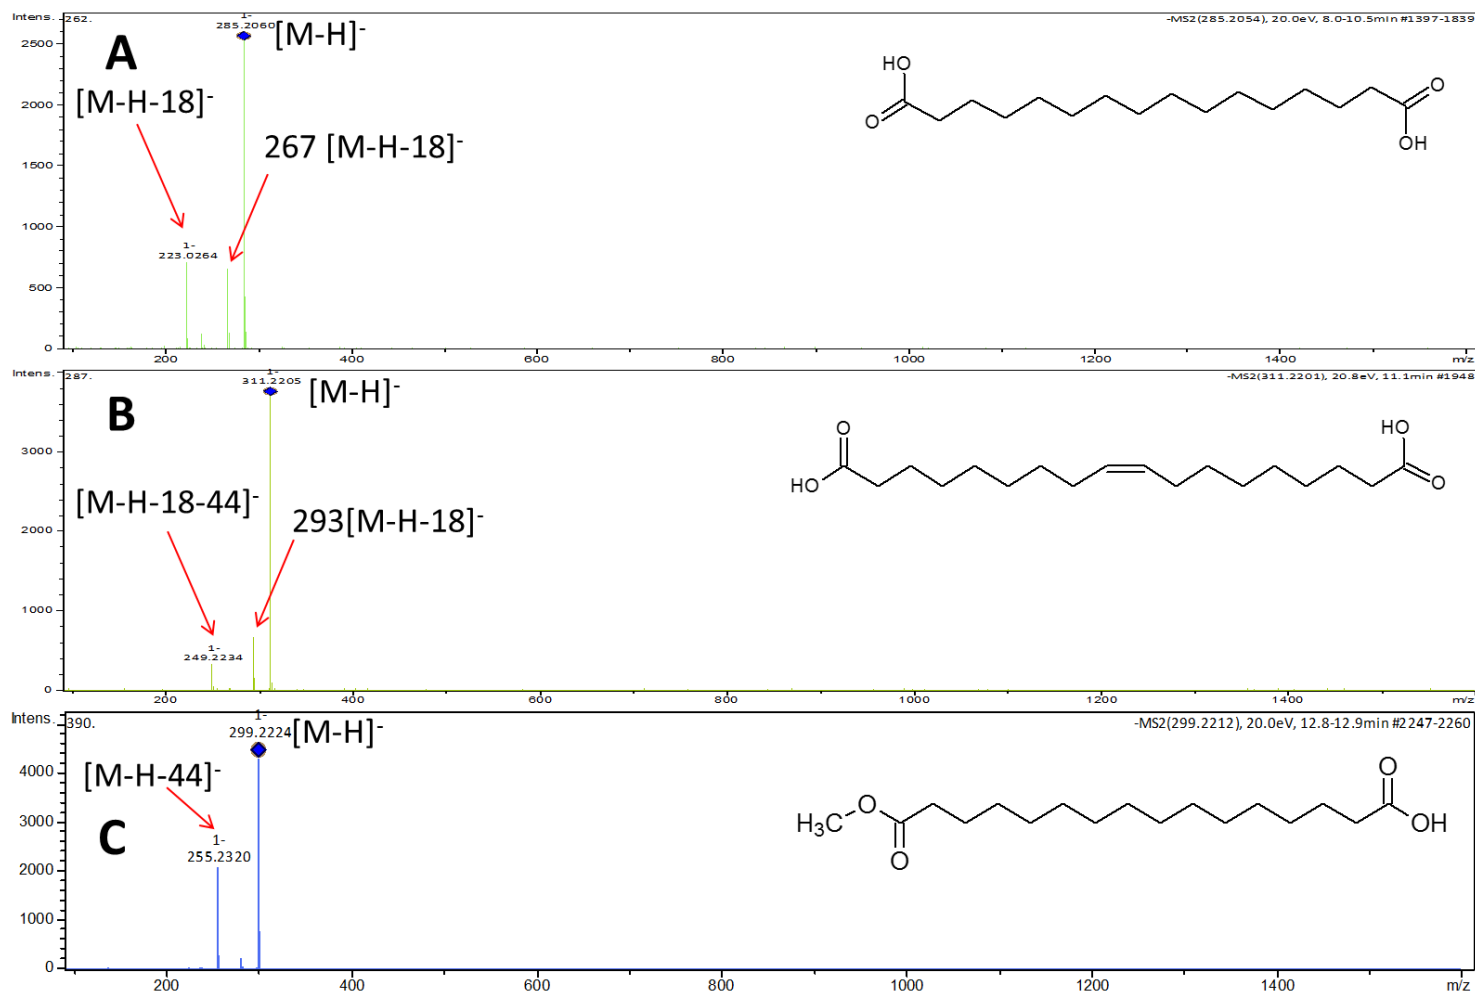

**Figure S8.**  $MS^2$  Spectra of dicarboxylic fatty acids: **A** hexadecanedioic acid (peak **53**)  $[M-H]^-$   $m/z$  285.2060,  $C_{16}H_{31}O_4$ ; **B** octadecenedioic acid (peak **54**)  $[M-H]^-$   $m/z$  311.2205,  $C_{18}H_{32}O_4$ ; **C** Hexadecanedioic acid, monomethyl ester (peak **57**)  $[M-H]^-$   $m/z$  299.2060,  $C_{17}H_{32}O_4$

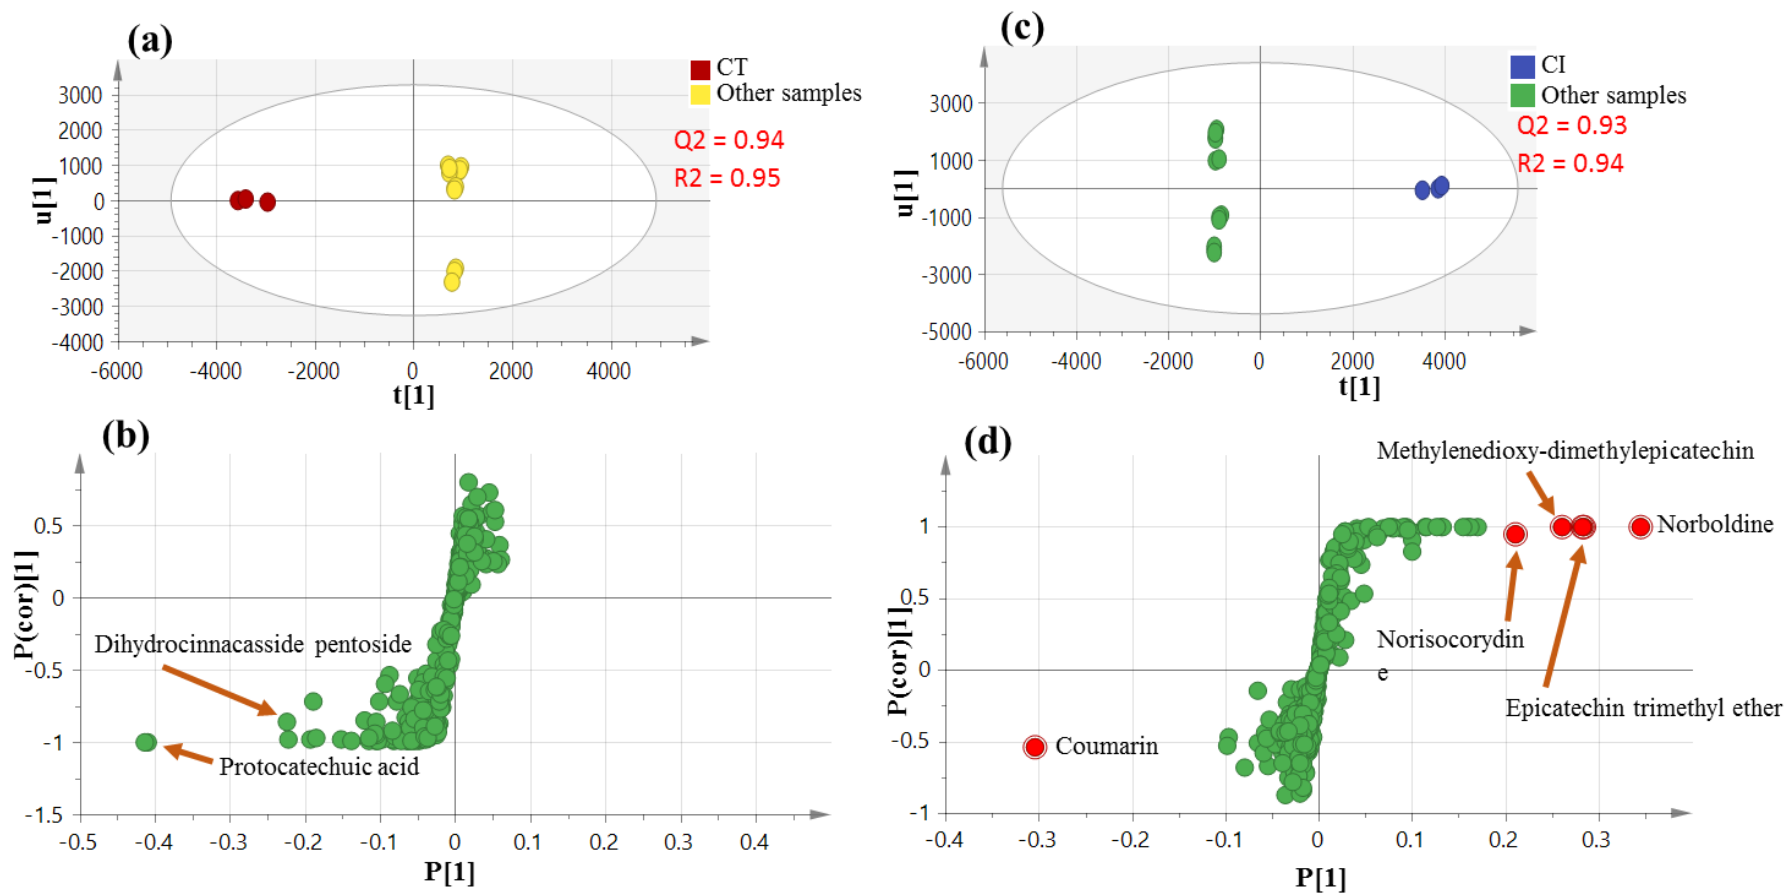

**Figure S9.** UPLC-MS OPLS-DA (a) score plot and (b) loading S-plots derived from modelling CT (*C. tamala* from Pakistan) against other samples in a separate group on negative ion mode. OPLS-DA (c) score plot and (d) loading S-plots derived from modelling CI (*C. iners* from Malaysia) against other samples in a separate group on positive ion mode.

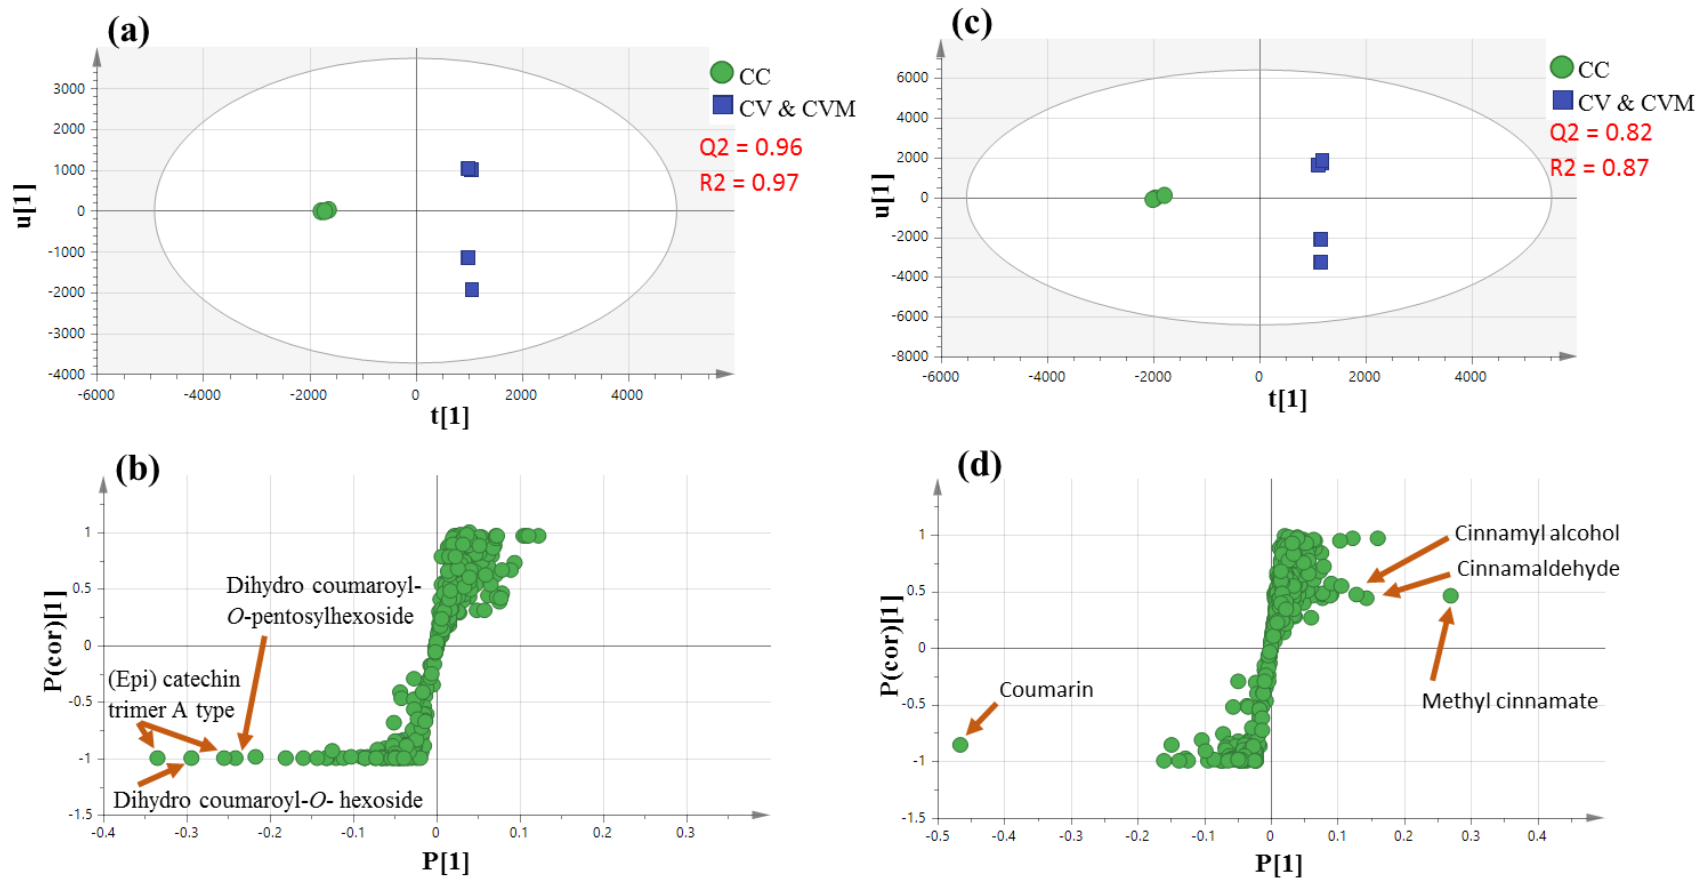

**Figure S10.** UPLC-MS OPLS-DA (a) score plot and (b) loading S-plots derived from modelling CC (*Cinnamomum cassia* from Malaysia) versus CV (*C. verum* from Pakistan) and CVM (*C. verum* from Malaysia) in a separate group on negative ion mode. OPLS-DA (c) score plot and (d) loading S-plots derived from modelling CC versus CV and CVM on positive ion mode. Each S-plot revealed the covariance  $p[1]$  against the correlation  $p(\text{cor})[1]$  of the variables of the discriminating component.

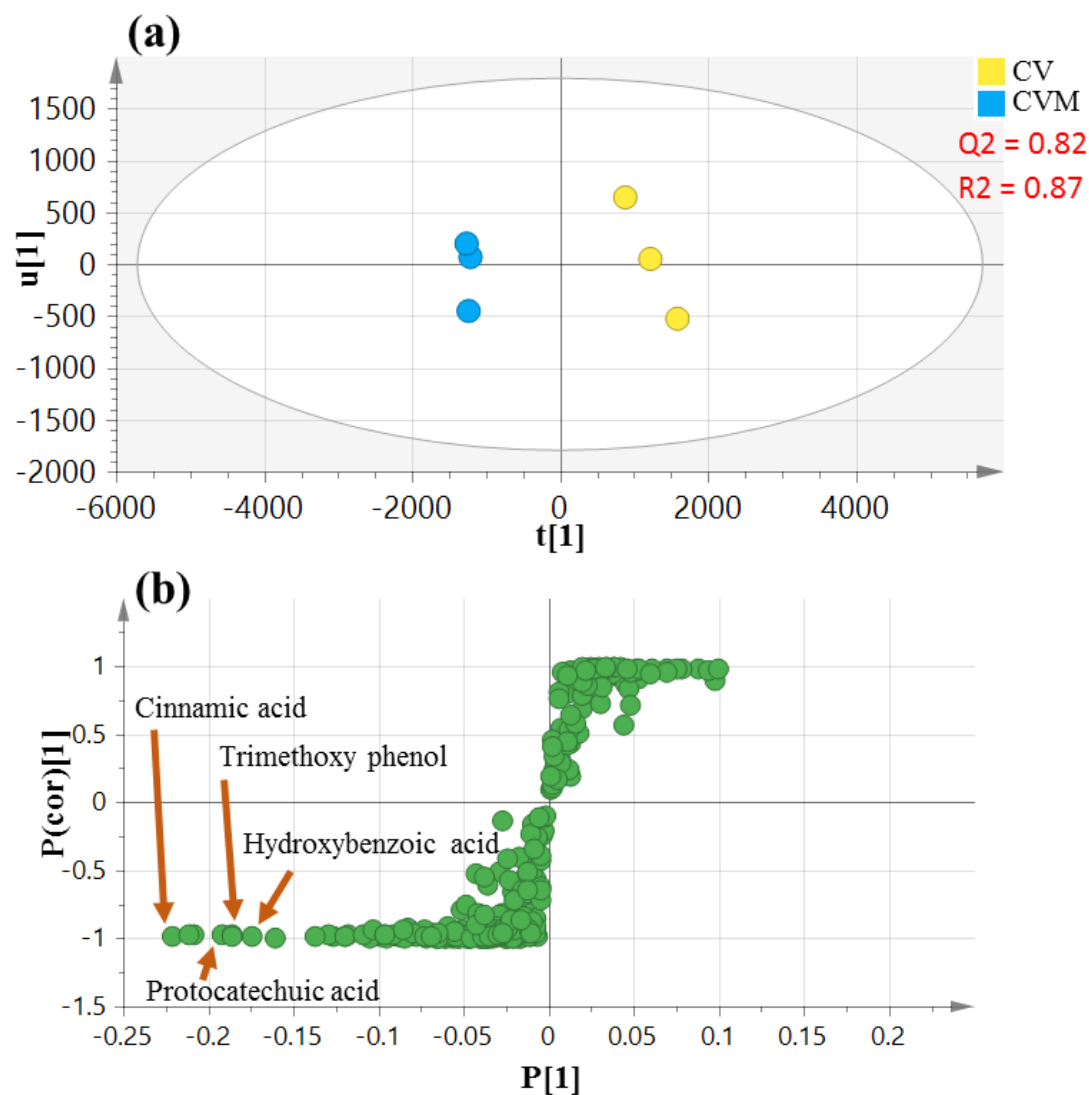

**Figure S11.** UPLC-MS OPLS-DA (a) score plot and (b) loading S-plots derived from modelling CV (*C. verum* from Pakistan) versus CVM (*C. verum* from Malaysia) on negative ion mode revealing the covariance  $p[1]$  against the correlation  $p(\text{cor})[1]$  of the variables of the discriminating component.

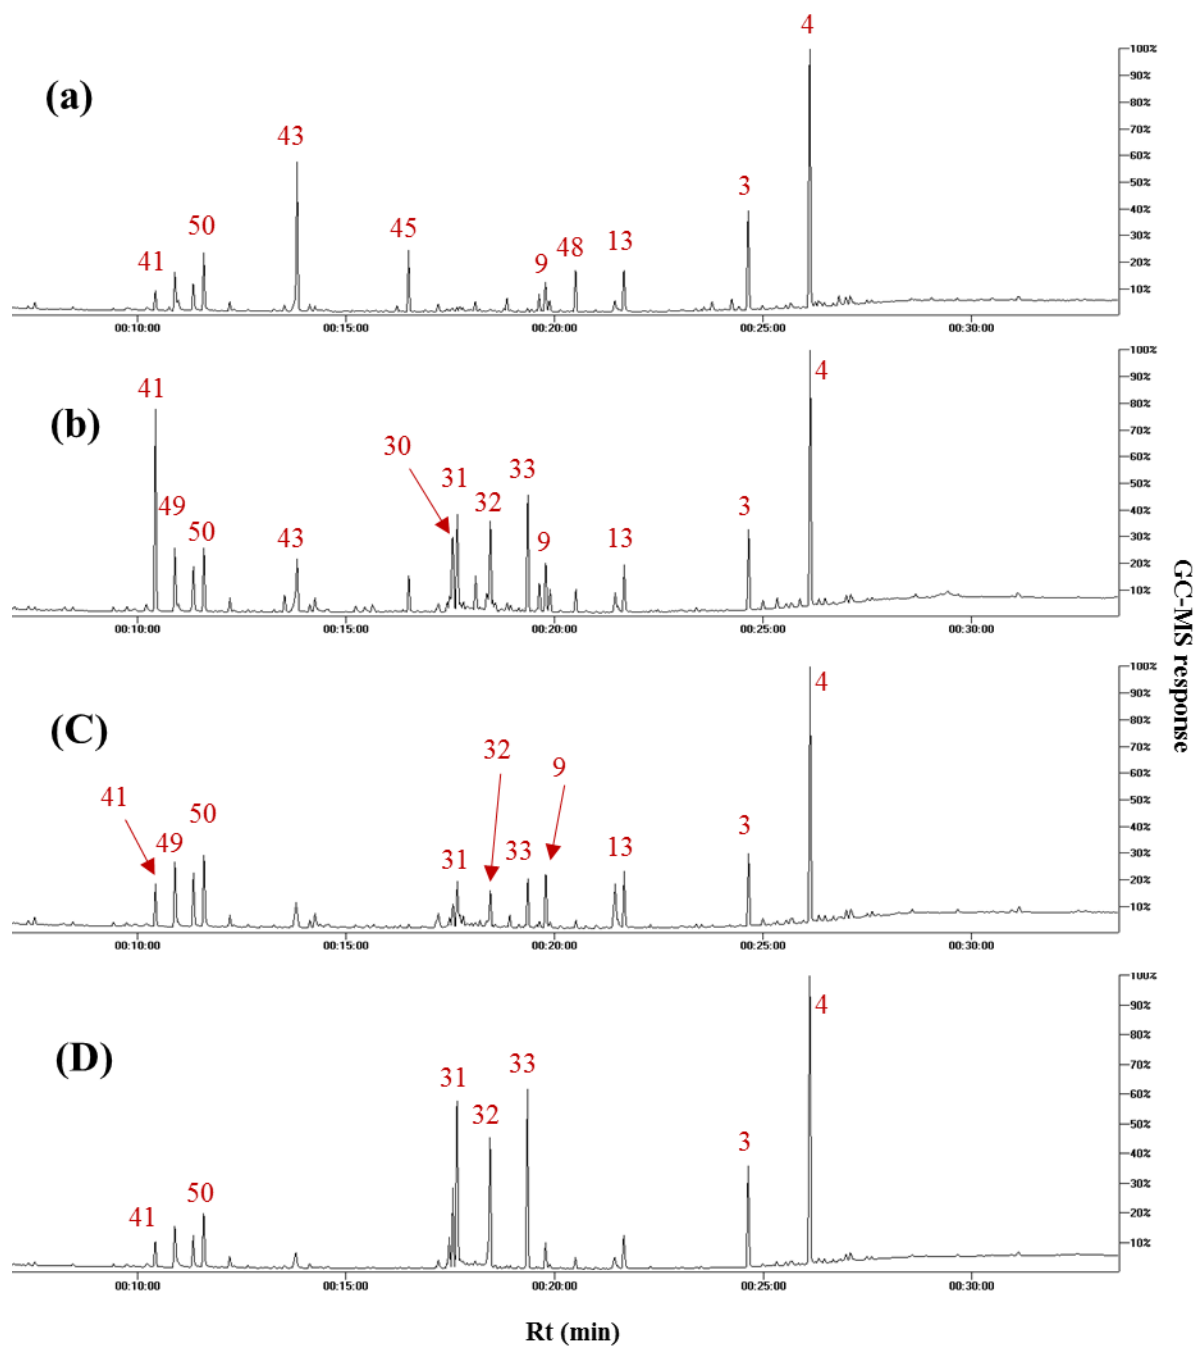

**Figure S12.** Representative SPME-GC-MS chromatograms of cinnamon primary metabolites, acquired from (a) CI (*C. iners* from Malaysia), (b) CT (*C. tamala* from Pakistan) and (c) CV (*C. verum* from Pakistan).

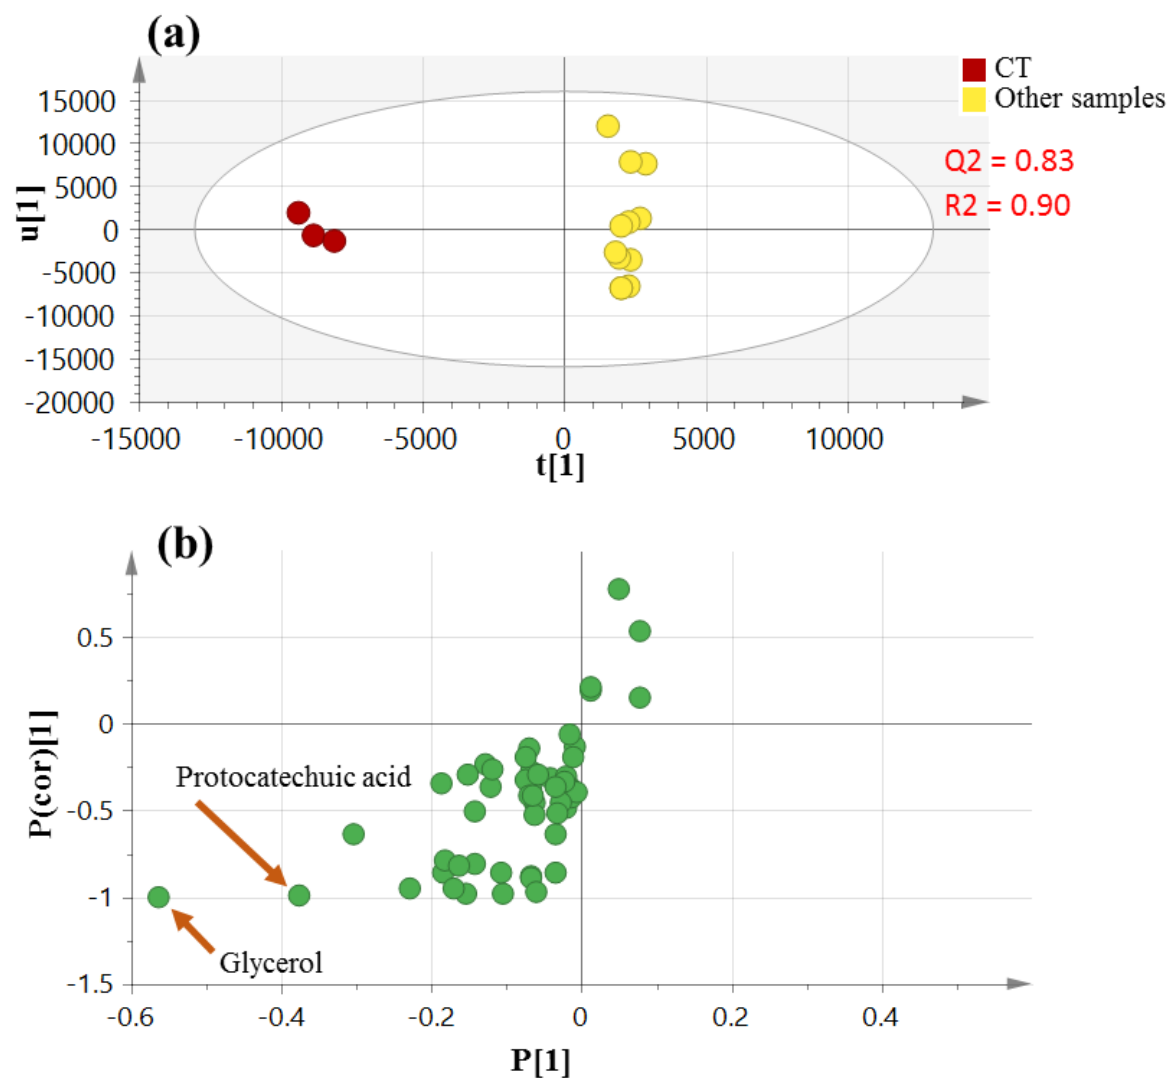

**Figure S13.** GC-MS OPLS-DA (a) score plot and (b) loading S-plots derived from modelling CT (*C. tamala* from Pakistan) versus all other samples revealing the covariance  $p[1]$  against the correlation  $p(\text{cor})[1]$  of the variables of the discriminating component.

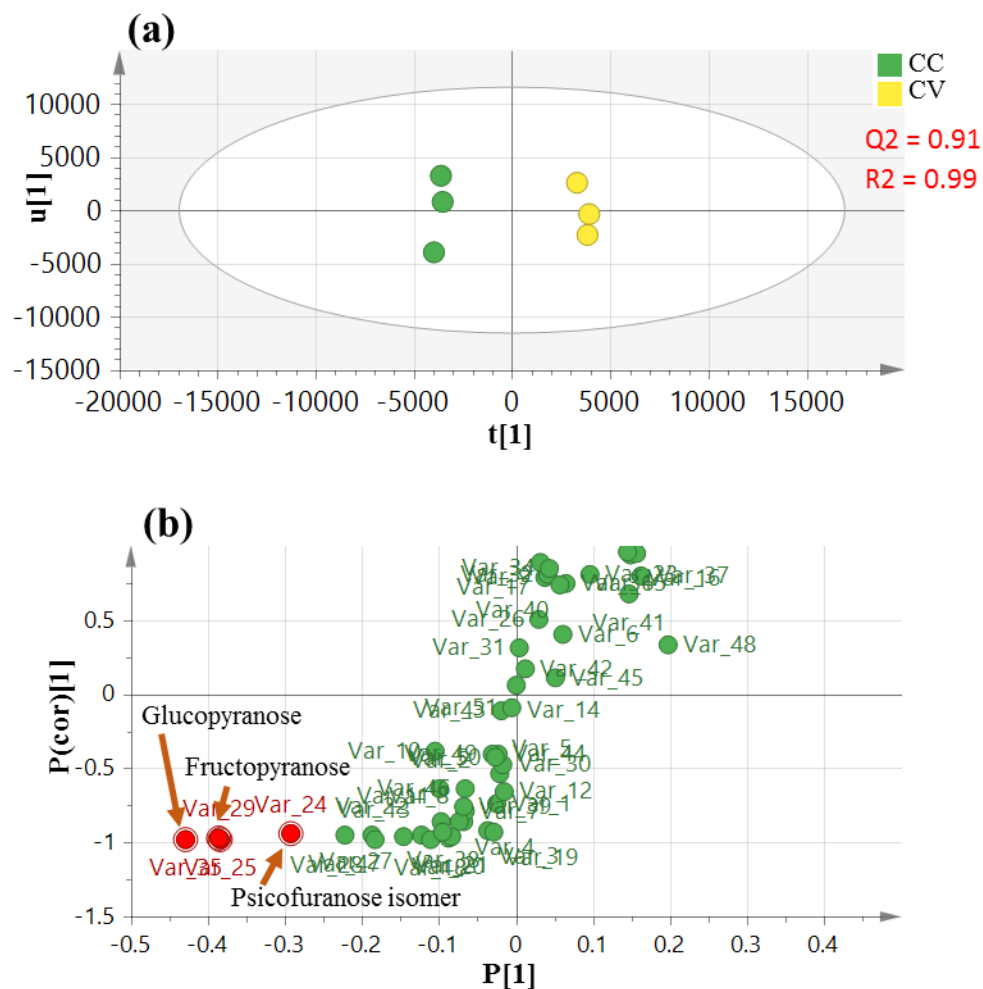

**Figure S14.** GC-MS OPLS-DA (a) score plot and (b) loading S-plots derived from modelling CC (*Cinnamomum cassia* from Malaysia) versus CV (*C. verum* from Pakistan) revealing the covariance  $p[1]$  against the correlation  $p(\text{cor})[1]$  of the variables of the discriminating component.
